# Supplementary material
Source: PubMed Central journal article supplement (PMC2034175)
Supplement: bjpg57-144TableS2.pdf [file bjpg57-144TableS2.pdf]

Table 2. Pooled and meta-analysis of ultra-short screening tests for depression in primary care.

| Year                        | Author                                            | Meta<br>-analysis<br>weight | Meta<br>-analysis<br>relative<br>risk | Total<br>sample<br>size | Pooled<br>weight (%) | Prevalence<br>(%) | Sensitivity<br>(%) | Specificity<br>(%) | PPV<br>(%) | NPV<br>(%) |
|-----------------------------|---------------------------------------------------|-----------------------------|---------------------------------------|-------------------------|----------------------|-------------------|--------------------|--------------------|------------|------------|
| Single question tests       |                                                   |                             |                                       |                         |                      |                   |                    |                    |            |            |
| 1997                        | Whooley MA <i>et al</i> <sup>52</sup>             | 4.122                       | 2.08                                  | 536                     | 3.0                  | 18.1              | 92.78              | 61.96              | 35.02      | 97.49      |
| 1997                        | Whooley MA <i>et al</i> <sup>52</sup>             | 4.122                       | 2.75                                  | 536                     | 3.0                  | 18.1              | 79.38              | 71.98              | 38.50      | 94.05      |
| 2003                        | Lowe <i>et al</i> <sup>47</sup>                   | 0.97                        | 6.56                                  | 310                     | 1.76                 | 17.7              | 52.73              | 94.12              | 65.91      | 90.23      |
| 2003                        | Lowe <i>et al</i> <sup>47</sup>                   | 0.71                        | 9.33                                  | 310                     | 1.76                 | 17.7              | 72.73              | 94.12              | 72.73      | 94.12      |
| 2003                        | Osborn <i>et al</i> <sup>56</sup>                 | 24.49                       | 12.2                                  | 13 670                  | 77.6                 | 7.7               | 7.79               | 99.5               | 56.6       | 92.8       |
| 2004                        | Corson <i>et al</i> <sup>48</sup>                 | 5.87                        | 3.88                                  | 1211                    | 6.8                  | 36.0              | 48.85              | 96.77              | 89.50      | 77.08      |
| 2005                        | Arroll B <i>et al</i> <sup>54</sup>               | 1.49                        | 13.86                                 | 936                     | 5.3                  | 5.0               | 74.0               | 94.3               | 40.7       | 98.6       |
| 2006                        | Means-Christensen <i>et al</i> <sup>59</sup>      | 0.61                        | 3.42                                  | 115                     | 0.65                 | 35.6              | 85.4               | 73.0               | 63.6       | 90.0       |
| Sub-Total                   | Pooled effect for single<br>Question Tests        |                             |                                       | 17 624                  |                      | 25.49             | 32                 | 97                 | 55.6       | 92.3       |
| Two or three question tests |                                                   |                             |                                       |                         |                      |                   |                    |                    |            |            |
| 1994                        | Spitzer RL <i>et al</i> <sup>53</sup>             | 2.27                        | 3.57                                  | 439                     | 4.5                  | 29.38             | 68.99              | 81.94              | 61.38      | 86.39      |
| 1997                        | Whooley MA <i>et al</i> <sup>52</sup>             | 4.57                        | 1.77                                  | 536                     | 5.6                  | 18.10             | 95.88              | 56.95              | 32.98      | 98.43      |
| 1998                        | Brody <i>et al</i> <sup>45</sup>                  | 3.9                         | 5.06                                  | 1000                    | 10.35                | 32.50             | 49.23              | 100.00             | 100.00     | 80.36      |
| 2003                        | Arroll B <i>et al</i> <sup>51</sup>               | 3.07                        | 2.2                                   | 421                     | 4.4                  | 37.29             | 17.83              | 99.62              | 96.55      | 67.09      |
| 2003                        | Arroll B <i>et al</i> <sup>51</sup>               | 2.17                        | 3.57                                  | 421                     | 4.4                  | 37.29             | 96.82              | 67.05              | 63.60      | 97.25      |
| 2003                        | Kroenke <i>et al</i> <sup>46</sup>                | 11.65                       | 0.17                                  | 580                     | 6.0                  | 7.07              | 82.93              | 10.02              | 6.55       | 88.52      |
| 2003                        | Kroenke <i>et al</i> <sup>46</sup>                | 9.48                        | 0.45                                  | 580                     | 6.0                  | 7.07              | 92.68              | 26.35              | 8.74       | 97.93      |
| 2004                        | Corson <i>et al</i> <sup>48</sup>                 | 2.79                        | 9.26                                  | 1211                    | 12.5                 | 20.73             | 95.22              | 88.96              | 69.28      | 98.61      |
| 2004                        | Corson <i>et al</i> <sup>48</sup>                 | 2.56                        | 10.21                                 | 1211                    | 12.5                 | 20.73             | 76.10              | 95.00              | 79.92      | 93.83      |
| 2004                        | Henckel <i>et al</i> <sup>29</sup>                | 3.6                         | 1.8                                   | 431                     | 4.5                  | 9.98              | 90.70              | 61.86              | 20.86      | 98.36      |
| 2004                        | Henckel <i>et al</i> <sup>29</sup>                | 2.79                        | 2.65                                  | 431                     | 4.5                  | 9.98              | 88.37              | 70.88              | 25.17      | 98.21      |
| 2005                        | Lowe <i>et al</i> <sup>50</sup>                   | 2.56                        | 3.8                                   | 520                     | 5.4                  | 13.65             | 87.32              | 77.95              | 38.51      | 97.49      |
| 2005                        | Arroll B <i>et al</i> <sup>54</sup>               | 4.6                         | 3.8                                   | 936                     | 9.7                  | 5.0               | 95.7               | 78.4               | 18.9       | 99.7       |
| 2005                        | Arroll B <i>et al</i> <sup>54</sup>               | 2.27                        | 8.75                                  | 936                     | 9.7                  | 5.0               | 95.7               | 89.4               | 32.4       | 99.7       |
| Sub-Total                   | Pooled effect for two<br>and three question tests |                             |                                       | 9653                    |                      | 17.6              | 73.7               | 74.7               | 38.3       | 93.0       |

PPV = positive predictive value. NPV = negative predictive value.
